# Supplementary material for: From synthetic to biogenic Mg-containing calcites: a comparative study using FTIR microspectroscopy
Source: Royal Society of Chemistry journal article supplement (doi:10.1039/c2cp22453d), 2012-01-01
Supplement: c2cp22453d.pdf [file c2cp22453d.pdf]

Cite this: DOI: 10.1039/c0xx00000x

www.rsc.org/xxxxxx

PAPER

### Supplementary information:

## From synthetic to biogenic Mg-containing calcite: a comparative study using FTIR microspectroscopy

Xia Long,<sup>a</sup> Michael J. Nasse,<sup>b,c</sup> Yurong Ma,<sup>a\*</sup> Limin Qi<sup>a\*</sup>

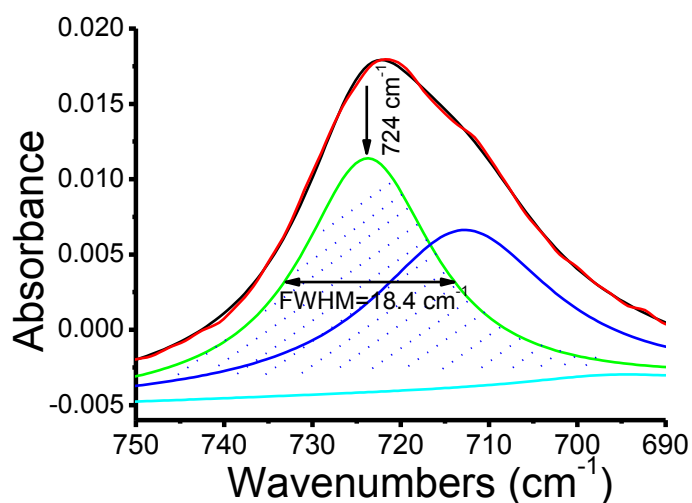

Fig. S1. The peak position and FWHM of  $\nu_4$ -3 of synthetic Mg-calcite-1 is shown as an example for multi-peak fitting. The red curve is the measured spectrum, the black curve corresponds to the result/sum of all singlet bands from the multi-peak fitting, and the other colours are singlet Lorentzian bands. The peak position, FWHM, and peak area of the Lorentzian fitting curves were calculated with OMNIC from Thermo Scientific. The FWHM of  $\nu_4$ -3 is  $18.4 \text{ cm}^{-1}$ . The peak position at  $724 \text{ cm}^{-1}$  was marked with a black arrow.

Cite this: DOI: 10.1039/c0xx00000x

www.rsc.org/xxxxxx

PAPER

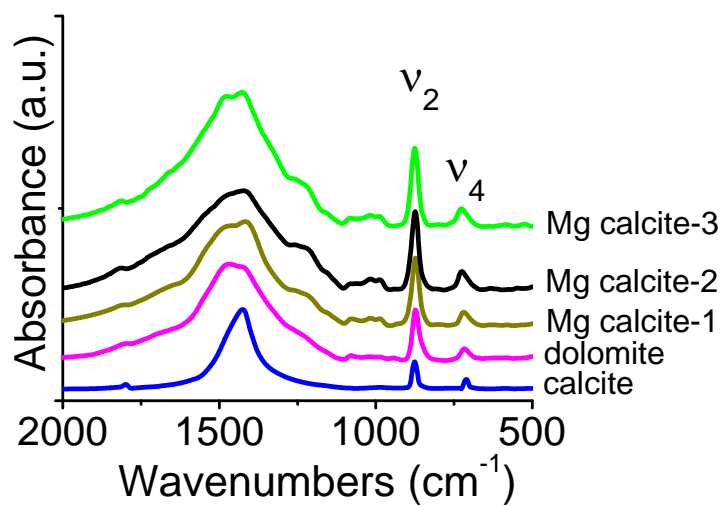

Fig. S2 KBr pellet FTIR spectra of geogenic calcite with 0 mol-% Mg, synthetic Mg calcite-1, -2, and -3 with 20, 30, and 39 mol-% Mg, and dolomite with 50 mol-% Mg, respectively.

Cite this: DOI: 10.1039/c0xx00000x

www.rsc.org/xxxxxx

PAPER

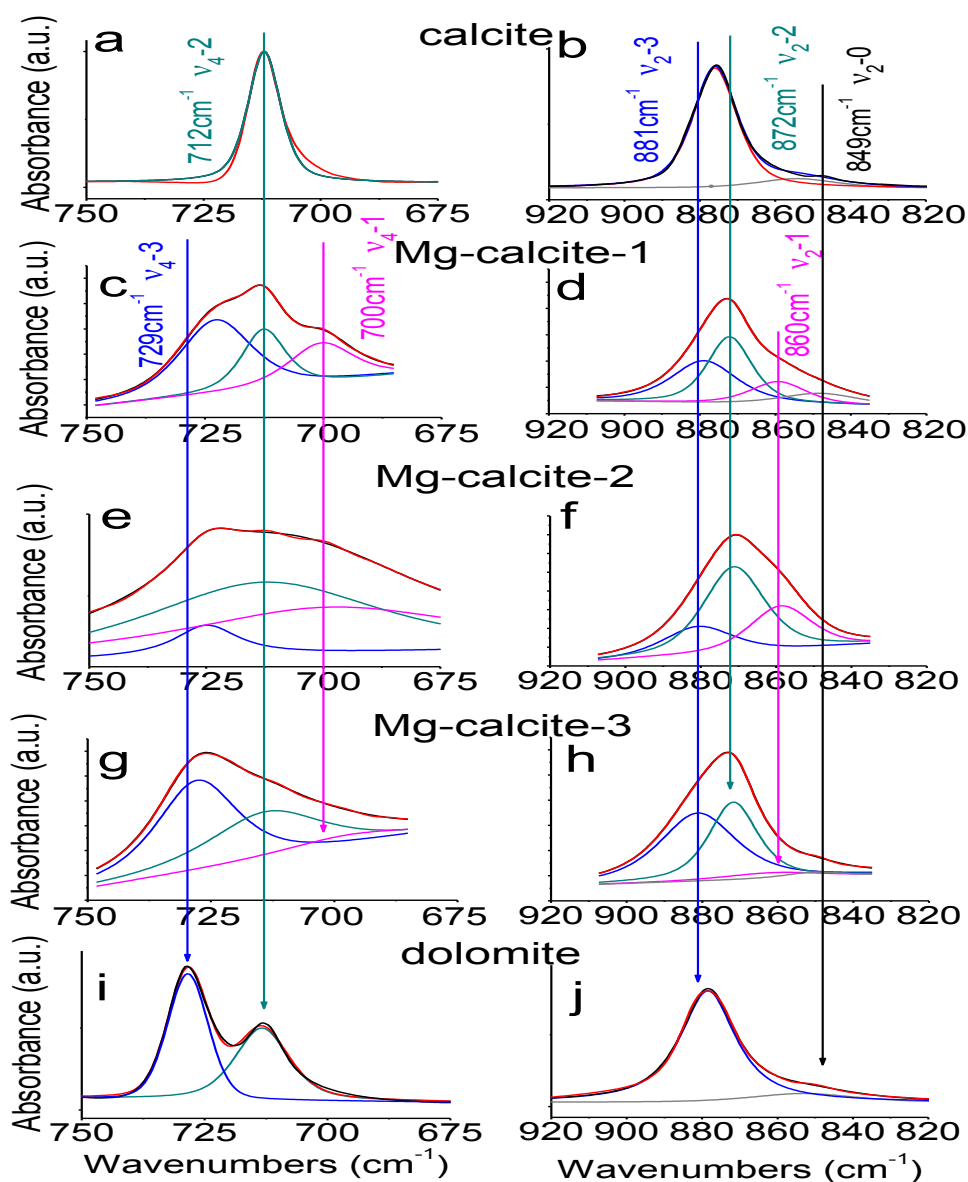

**Fig. S3** Lorentzian multi-peak fitting of the  $\nu_4$  (a, c, e, g, i) and  $\nu_2$  (b, d, f, h, j) spectral bands of the KBr pellet FTIR spectra from Fig. S2: geogenic calcite with 0 mol-% Mg (a, b), synthetic Mg calcite-1 with 20 mol-% Mg (c, d), Mg calcite-2 with 30 mol-% Mg (e, f), Mg calcite-3 with 39 mol-% Mg (g, h), and dolomite with 50 mol-% Mg (i, j). The red curve is the measured spectrum, the black curve corresponds to the result/sum of all single peaks from the multi-peak fit, and the other colours are single Lorentzian peaks.

Cite this: DOI: 10.1039/c0xx00000x

www.rsc.org/xxxxxx

PAPER

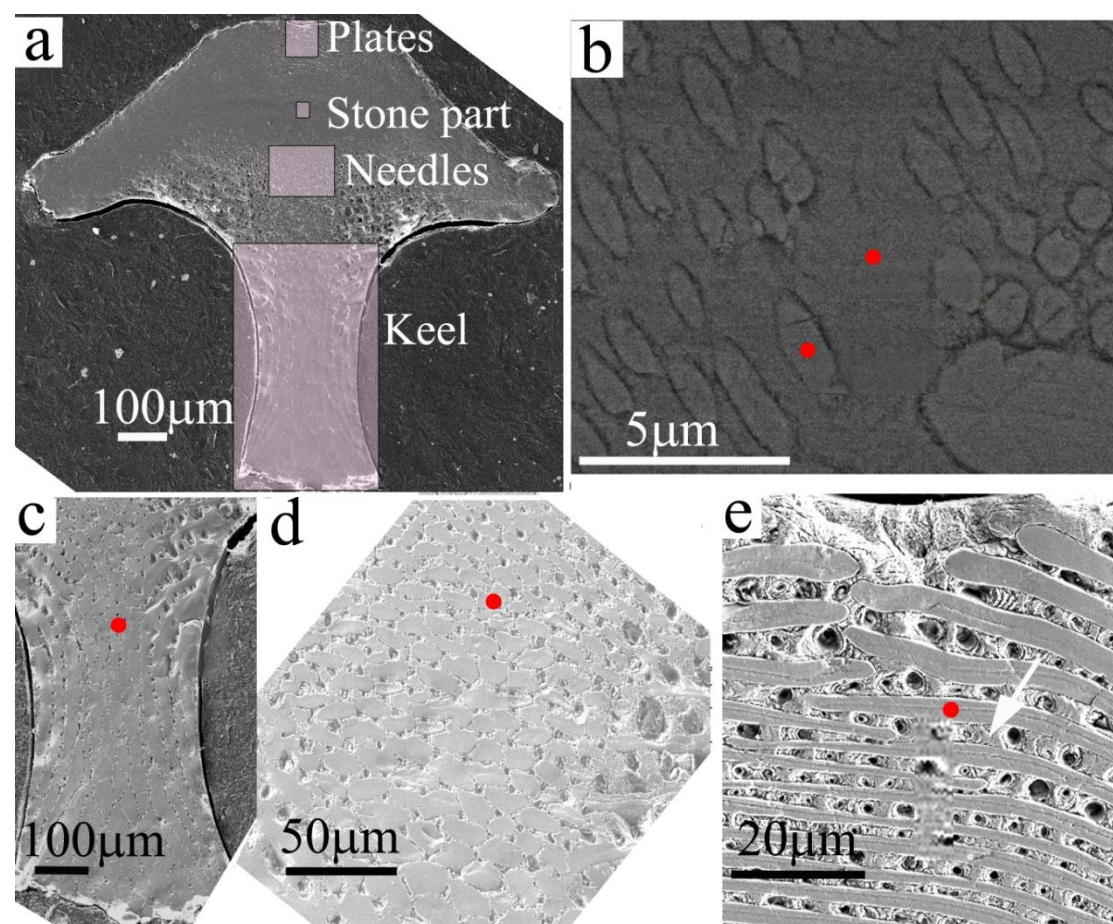

**Fig. S4** Scanning electron microscopy (SEM) images of a transverse SUT cross section at the mature end. The red dots indicate in which regions the elemental analysis was done. (a) Overview cross section exhibiting the different regions studied with energy dispersive X-ray spectroscopy (EDS) to determine the local Mg content. The EDS spectra are not shown here. These four regions, stone part, plates, needles and keel are generously consistent with the positions used in the FTIRM measurement shown in Fig. 3-6, S5, and S6. (b) Stone part composed of very high Mg polycrystalline matrix (35-43 mol-% Mg) and single crystalline needles (~10-15 mol-% Mg). (c) Keel (3-4 mol-% Mg). (d) Needles (4-5 mol-% Mg). (e) Plates (10-15 mol-% Mg), the white arrow indicating the very high Mg polycrystalline matrix in the plates area.

Cite this: DOI: 10.1039/c0xx00000x

www.rsc.org/xxxxxx

PAPER

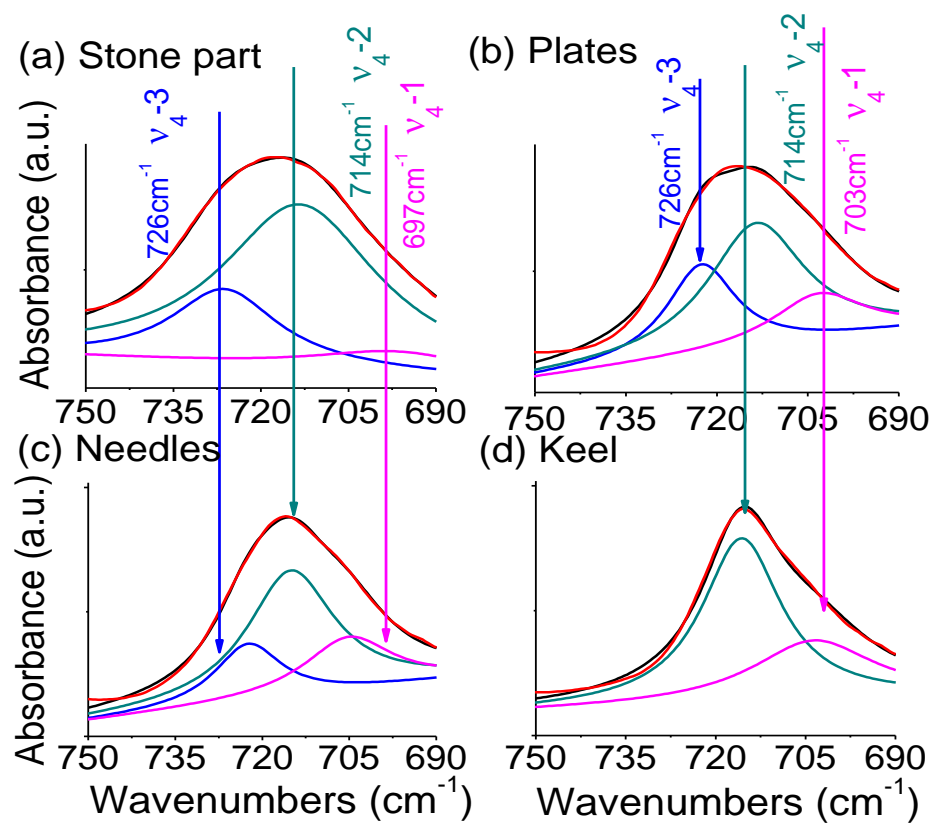

Fig. S5 Lorentzian multi-peak fitting of the  $\nu_4$  spectral band of the tFTIRM spectra shown in Fig. 6b and c from different SUT positions. The red curve is the measured spectrum, the black curve corresponds to the result/sum of all single peaks from the multi-peak fit, and the other colours are single Lorentzian peaks.

Cite this: DOI: 10.1039/c0xx00000x

www.rsc.org/xxxxxx

PAPER

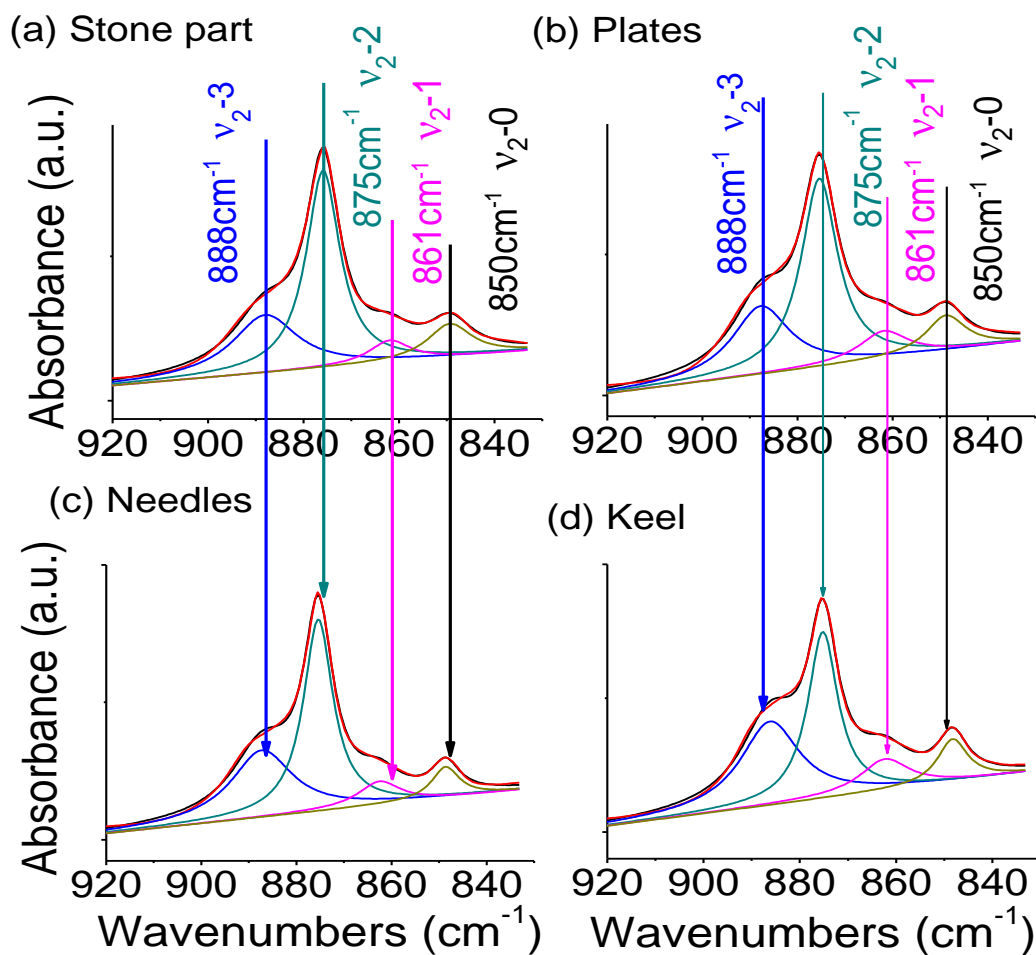

Fig. S6 Lorentzian multi-peak fitting of the  $\nu_2$  spectral band of the tFTIR spectra shown in Fig. 6b and c from different SUT positions. The red curve is the measured spectrum, the black curve corresponds to the result/sum of all single peaks from the multi-peak fit, and the other colours are single Lorentzian peaks.

Cite this: DOI: 10.1039/c0xx00000x

www.rsc.org/xxxxxx

PAPER

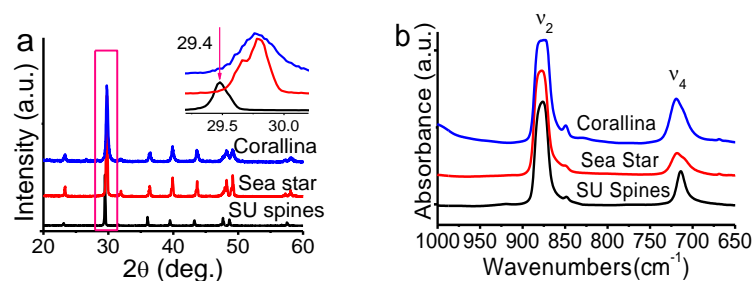

Fig. S7 XRD (a) and tFTIR spectra (b) of other biogenic Mg calcite minerals: SU spines, corallina, sea star spicules. The inset in (a) shows a close-up of the XRD peaks marked by the red box.

Table S1 Detailed results from the  $\nu_2$  and  $\nu_4$  multi-peak curve fitting of tFTIR spectra from other biogenic Mg-containing calcite minerals (SU spines, sea star spicules, and corallina).

|                   | Mg contents |                                       | $\nu_4$    |            |            | $\nu_2$    |            |            |            |
|-------------------|-------------|---------------------------------------|------------|------------|------------|------------|------------|------------|------------|
|                   |             |                                       | $\nu_4$ -1 | $\nu_4$ -2 | $\nu_4$ -3 | $\nu_2$ -0 | $\nu_2$ -1 | $\nu_2$ -2 | $\nu_2$ -3 |
| SU spines         | 4 mol-%     | Peak position<br>( $\text{cm}^{-1}$ ) |            | 714        |            | 847        |            | 875        | 882        |
|                   |             | FWHM<br>( $\text{cm}^{-1}$ )          |            | 11.6       |            | 15.0       |            | 10.8       | 7.5        |
| Sea star spicules | 14 mol-%    | Peak position<br>( $\text{cm}^{-1}$ ) |            | 710        | 720        | 850        |            | 875        | 883        |
|                   |             | FWHM<br>( $\text{cm}^{-1}$ )          |            | 19.4       | 12.9       | 18.7       |            | 11.6       | 7.6        |

Cite this: DOI: 10.1039/c0xx00000x

www.rsc.org/xxxxxx

PAPER

|           |         |                                       |  |      |      |     |  |      |     |
|-----------|---------|---------------------------------------|--|------|------|-----|--|------|-----|
| Corallina | 14mol-% | Peak position<br>( $\text{cm}^{-1}$ ) |  | 712  | 721  | 849 |  | 873  | 882 |
|           |         | FWHM<br>( $\text{cm}^{-1}$ )          |  | 18.4 | 12.4 | 6.6 |  | 12.6 | 8.2 |



Cite this: DOI: 10.1039/c0xx00000x

www.rsc.org/xxxxxx

PAPER

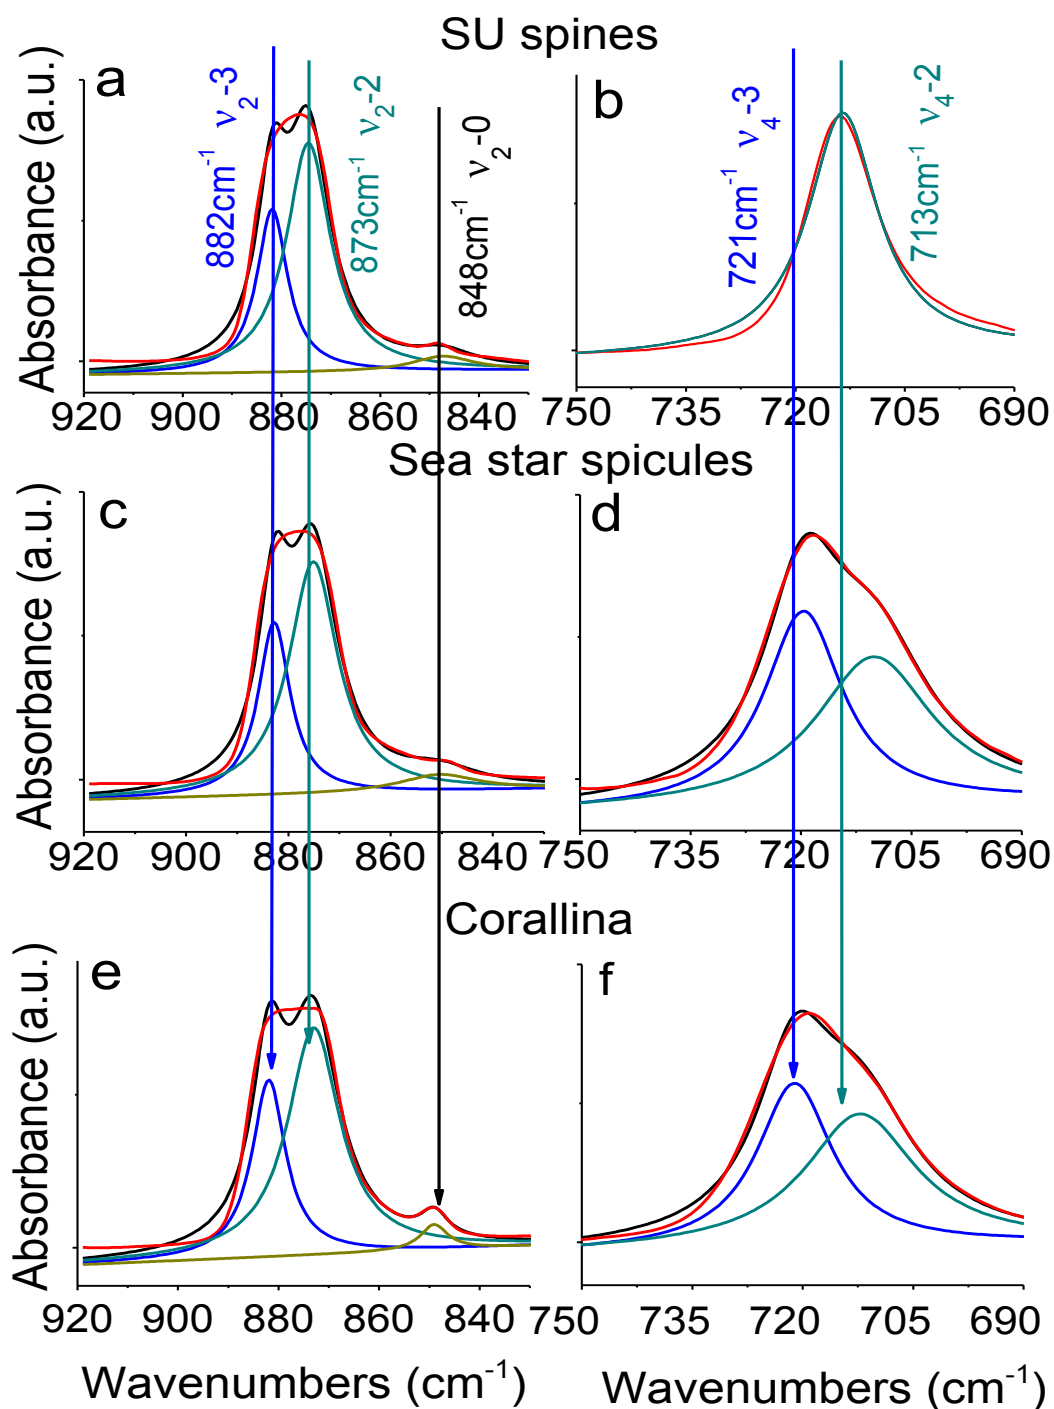

Cite this: DOI: 10.1039/c0xx00000x

www.rsc.org/xxxxxx

**PAPER**

---

**Fig. S8. Lorentzian multi-peak curve fitting of  $\nu_4$  and  $\nu_2$  bands of Sea Urchin (SU) spines, corallina, and sea star spicules.**
